# Supplementary material
Source: PubMed Central journal article supplement (PMC3356626)
Supplement: 1118125109_pnas.201118125SI.pdf [file 1118125109_pnas.201118125SI.pdf]

# Supporting Information

Löving et al. 10.1073/pnas.1118125109

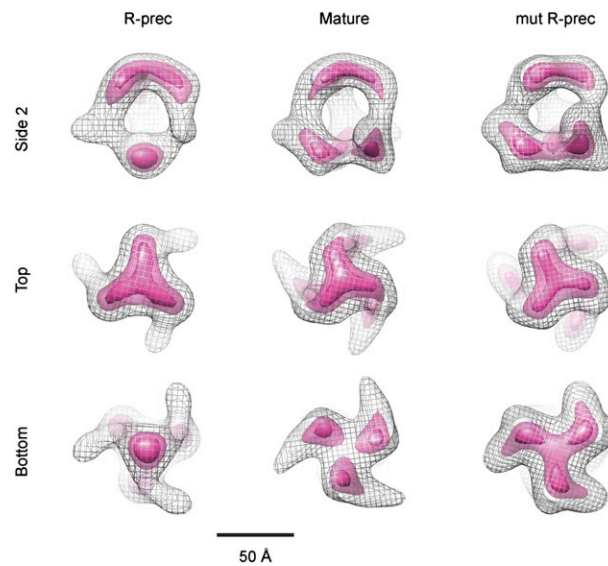

Fig. S1. Surface-rendered 3D reconstructions of the R-peptide (*Left*), the mature (*Center*), and the L651A mutant Env (*Right*) viruses at full volume (mesh) and at two thresholds of increased density (magenta). Top, side, and bottom views are shown. (Scale bar, 50 Å.)

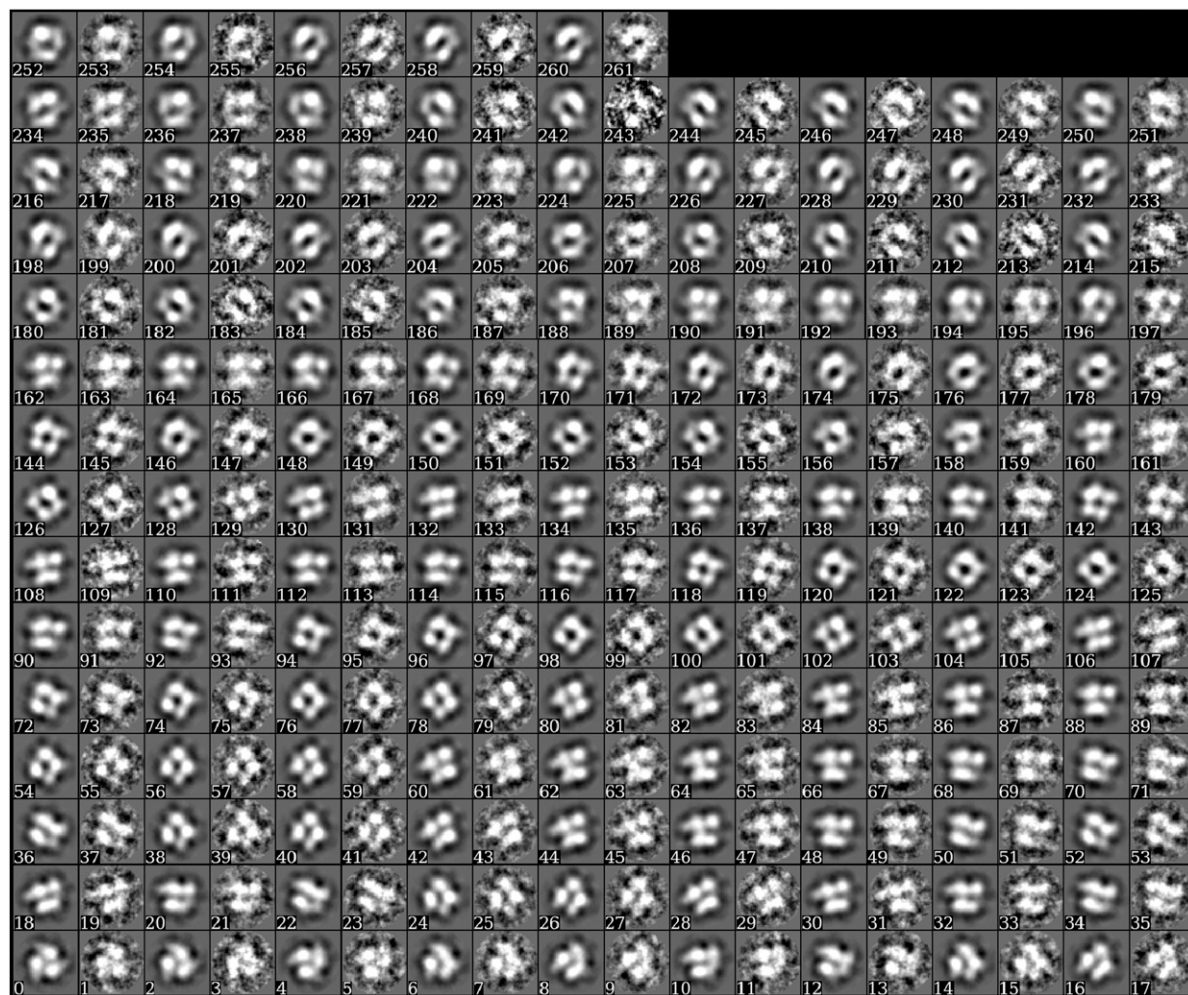

**Fig. S2.** Map projections and class averages of the 3D reconstruction of the native R-peptide Env. Map projections (even-numbered images) are shown with the corresponding class averages (odd-numbered images) (*Right*).

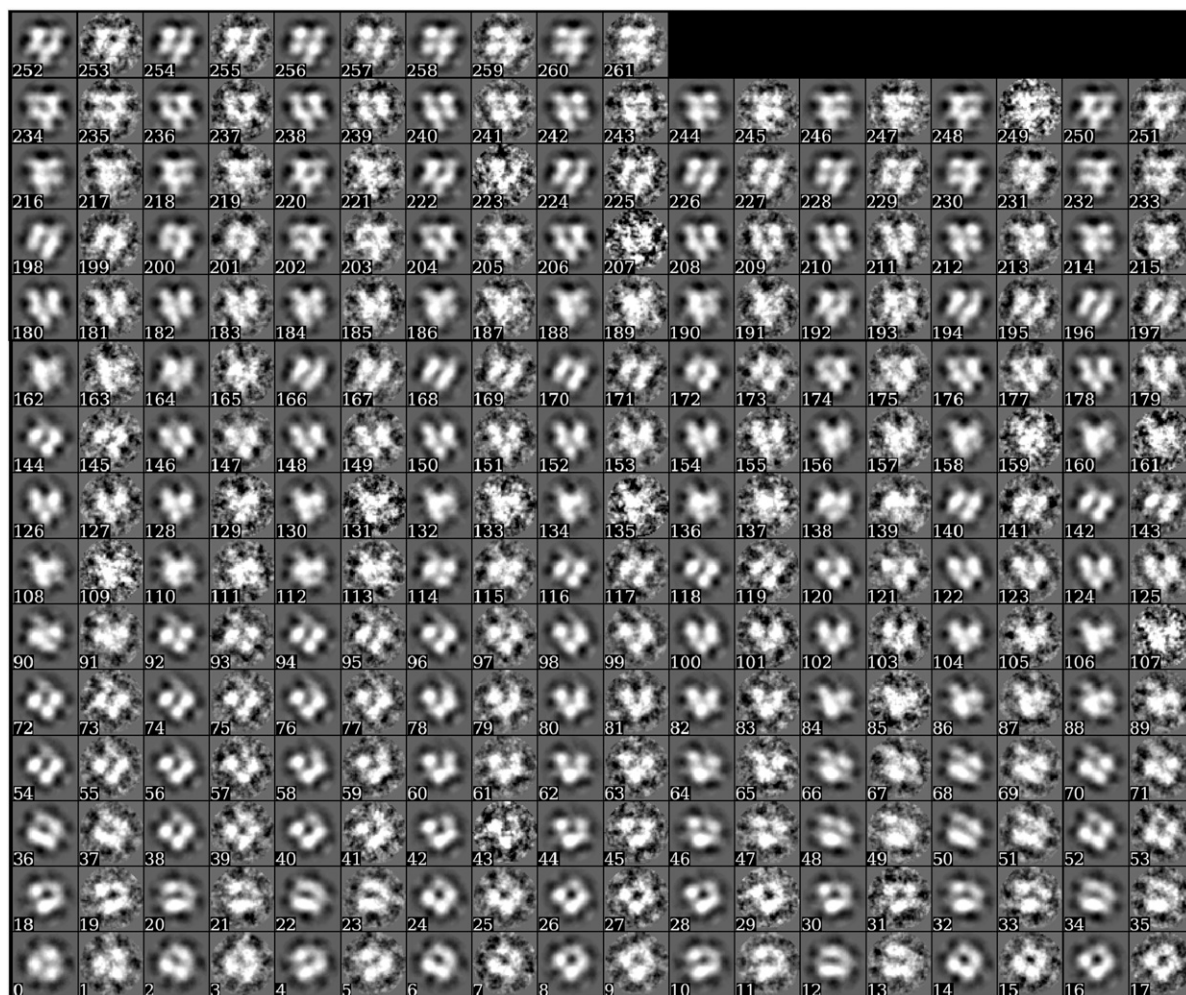

Fig. S3. Map projections and class averages of the 3D reconstruction of the activated intermediate (isomerization-arrested stage; IAS) form of the R-peptide Env. Map projections (even-numbered images) are shown with the corresponding class averages (odd-numbered images) (Right).



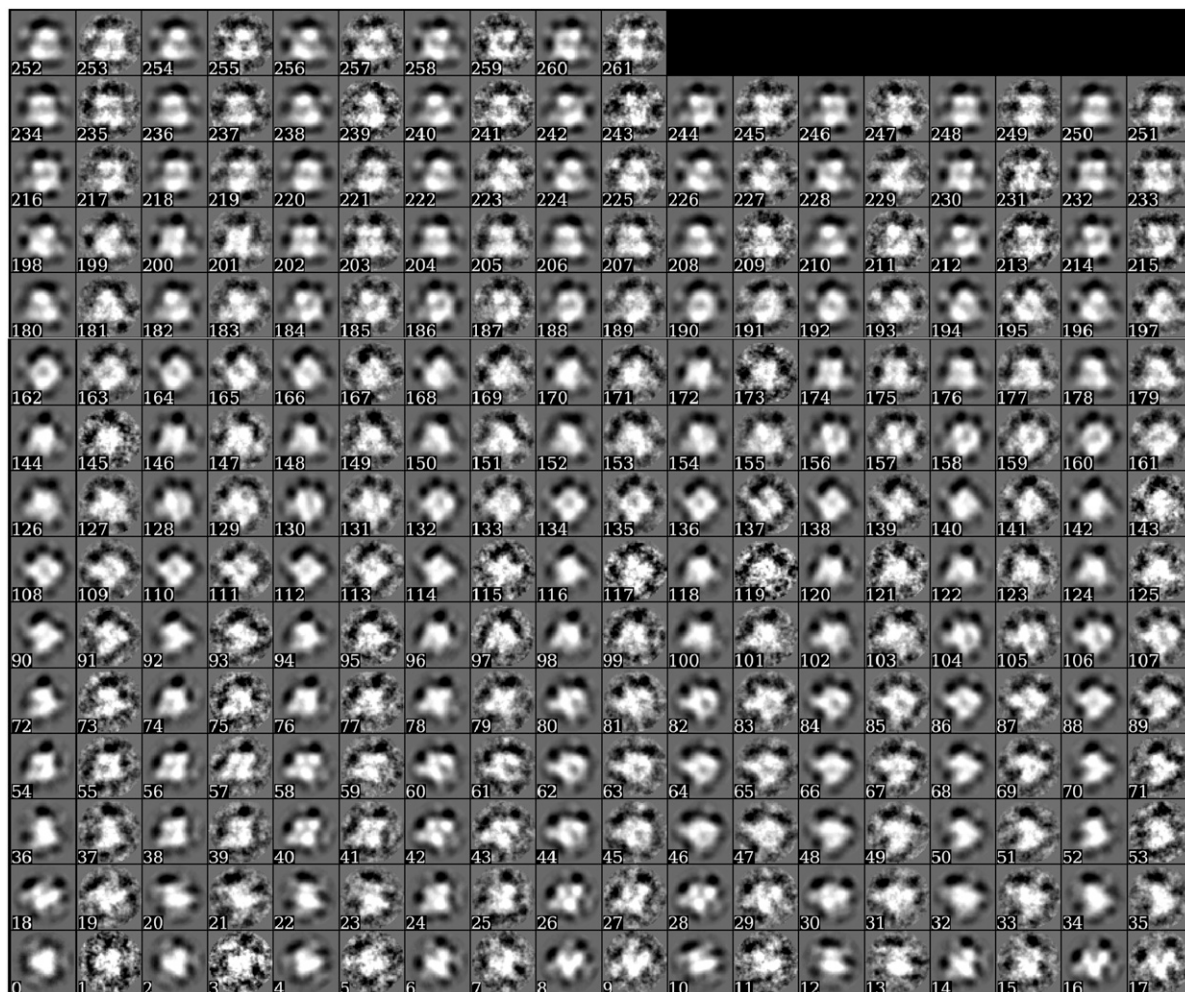

**Fig. 54.** Map projections and class averages of the 3D reconstruction of the R-peptide Env mutant L651A. Map projections (even-numbered images) are shown with the corresponding class averages (odd-numbered images) (*Right*).

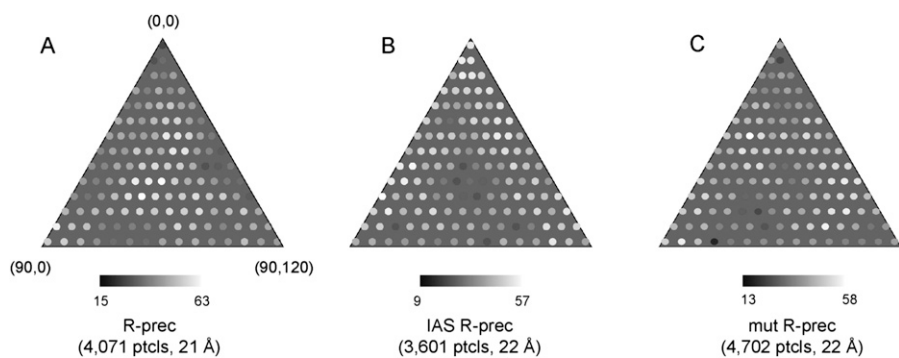

**Fig. 55.** Asymmetric triangles showing the distribution of images in the classes in the Env reconstructions of the R-peptide Env (*A*), the IAS form of the R-peptide Env (*B*), and the R-peptide L651A Env mutant (*C*), as displayed by EMAN (<http://blake.bcm.edu/emanwiki/EMAN/>). The grayscale shows the number of images per class. The number of particles included in the datasets and the resolution achieved (Å) are shown below each triangle.
